# Supplementary material
Source: MDPI journal article supplement (https://www.mdpi.com/2071-1050/13/4/2398)
Supplement: s1 [file s1]

**Table S1.** Summary of content analysis of articles retrieved.

| Author                                   | Year             | Objective                                                                                                                                  | Setting                                 | Content analysis of main findings                                                                                                                                                                                                                                                                                                                                                                                                                                                    |
|------------------------------------------|------------------|--------------------------------------------------------------------------------------------------------------------------------------------|-----------------------------------------|--------------------------------------------------------------------------------------------------------------------------------------------------------------------------------------------------------------------------------------------------------------------------------------------------------------------------------------------------------------------------------------------------------------------------------------------------------------------------------------|
|                                          | Country          |                                                                                                                                            | Target population                       |                                                                                                                                                                                                                                                                                                                                                                                                                                                                                      |
|                                          | Type of Document |                                                                                                                                            |                                         |                                                                                                                                                                                                                                                                                                                                                                                                                                                                                      |
| Champ CE, Larrobino NA & Haskins CP [43] | 2019             | To quantify vending machines in hospitals, and analyse how they correspond with dietary recommendations                                    | Hospital                                | <ul style="list-style-type: none"><li>- <b>Governance</b> and decision-making power of the organization instead of the industry on food supply.</li><li>- Transition from “for profit” to “<b>leading by example</b>” vision.</li><li>- <b>Long-term approach</b> for supply and education strategies.</li></ul>                                                                                                                                                                     |
|                                          | USA              |                                                                                                                                            | Service users of the Hospitals          |                                                                                                                                                                                                                                                                                                                                                                                                                                                                                      |
|                                          | Research article |                                                                                                                                            |                                         |                                                                                                                                                                                                                                                                                                                                                                                                                                                                                      |
| Reinhardt S. & Salvador RJ [53]          | 2018             | To explain the role of clinicians as food procurement advocates.<br>To describe Institutional Food Procurement as a Public Health Strategy | Healthcare institutions                 | <ul style="list-style-type: none"><li>- <b>Governance:</b> create a multi-level and multidisciplinary and transversal team to partner in policy development.</li><li>- <b>Commitment.</b></li><li>- <b>Communication</b> of the food strategy transitions to the general public to raise awareness.</li><li>- <b>External certification</b> useful in the process for change.</li><li>- <b>Investments</b> with a long-term approach (i.e. savings in healthcare).</li></ul>         |
|                                          | USA              |                                                                                                                                            | Healthcare professionals and clinicians |                                                                                                                                                                                                                                                                                                                                                                                                                                                                                      |
|                                          | Policy Forum     |                                                                                                                                            |                                         |                                                                                                                                                                                                                                                                                                                                                                                                                                                                                      |
| Pitts SJ, Schwartz B, <i>et al.</i> [56] | 2018             | To synthesize information on best practices on sustainability of healthy food service guidelines                                           | Hospital cafeterias                     | <ul style="list-style-type: none"><li>- <b>Investment:</b> training, equipment, supply capacity...</li><li>- <b>Food service:</b> control of portion sizes, innovative menus, continuous evaluation of dishes, awareness.</li><li>- <b>Process approach:</b> a progressive journey for transition.</li><li>- <b>Marketing</b> to introduce sustainable and healthy foods profitably.</li><li>- <b>Communication</b> with staff, visitors, patients to maintain motivation.</li></ul> |
|                                          | USA              |                                                                                                                                            | Food service Directors                  |                                                                                                                                                                                                                                                                                                                                                                                                                                                                                      |
|                                          | Research article |                                                                                                                                            |                                         |                                                                                                                                                                                                                                                                                                                                                                                                                                                                                      |

|                                           |                  |                                                                                                                                                   |                                                                              |                                                                                                                                                                                                                                                                                                                                                                                                                                                                                                                                                                                                                                                                                                                           |
|-------------------------------------------|------------------|---------------------------------------------------------------------------------------------------------------------------------------------------|------------------------------------------------------------------------------|---------------------------------------------------------------------------------------------------------------------------------------------------------------------------------------------------------------------------------------------------------------------------------------------------------------------------------------------------------------------------------------------------------------------------------------------------------------------------------------------------------------------------------------------------------------------------------------------------------------------------------------------------------------------------------------------------------------------------|
| Goggins G.<br>[55]                        | 2017             | To explore the organizational culture, procurement practices and other contextual factors that influence food provisioning in large organizations | Large organizations from the west of Ireland                                 | <ul style="list-style-type: none"> <li>- <b>Gender</b> approach.</li> <li>- <b>“Leading by example”</b> vs. “Value for money”</li> <li>- <b>Long-term approach</b>: investments required.</li> <li>- <b>Food service</b> and <b>food supply</b>: on-site catering and sourcing aligned to local food systems.</li> <li>- <b>Governance</b>: transversal and multilevel.</li> <li>- <b>Communication, awareness</b> and <b>relationship building</b> with stakeholders.</li> <li>- <b>Training</b> in-house staff and producers, with multilevel perspective; social, economic, and environmental impacts of food choices.</li> <li>- <b>Evaluation</b> of the strategy and cost efficiency.</li> </ul>                    |
|                                           | Ireland          |                                                                                                                                                   | Key decision makers on procurement management                                |                                                                                                                                                                                                                                                                                                                                                                                                                                                                                                                                                                                                                                                                                                                           |
|                                           | Research article |                                                                                                                                                   |                                                                              |                                                                                                                                                                                                                                                                                                                                                                                                                                                                                                                                                                                                                                                                                                                           |
| Gray S, Orme J, <i>et al.</i> [44]        | 2017             | To evaluate the impact and challenges of implementing a Food for Life approach                                                                    | NHS Trusts in England                                                        | <ul style="list-style-type: none"> <li>- <b>External certification</b> aid in the development and the commitment.</li> <li>- <b>Process approach</b> step-by-step (i.e. easier to start changing cafeteria food).</li> <li>- <b>Holistic approach</b>: system approach.</li> <li>- <b>Long-term</b> focus.</li> <li>- <b>Leadership</b> is a key factor for commitment and to mobilise a multidisciplinary group</li> <li>- <b>Governance</b>: multidisciplinary team.</li> <li>- <b>Training, awareness</b> for community engagement and education.</li> <li>- <b>Investment</b> at various levels (including on-site cooking infrastructures).</li> <li>- <b>“Lead-by-example”</b> also in vending machines.</li> </ul> |
|                                           | UK               |                                                                                                                                                   | Strategic managers, sustainability leaders and staff well-being coordinators |                                                                                                                                                                                                                                                                                                                                                                                                                                                                                                                                                                                                                                                                                                                           |
|                                           | Research article |                                                                                                                                                   |                                                                              |                                                                                                                                                                                                                                                                                                                                                                                                                                                                                                                                                                                                                                                                                                                           |
| Sørensen NN, Tetens I, <i>et al.</i> [54] | 2016             | To measure the effect of the Danish Organic Action Plan 2020.                                                                                     | Danish public kitchens                                                       | <ul style="list-style-type: none"> <li>- <b>External certification</b>: to set targets and as drivers for change.</li> <li>- <b>Training</b> of kitchen staff for organic conversion. Increasing knowledge leads to increase commitment.</li> <li>- <b>Multidisciplinary</b> and <b>holistic approach</b> to training and curriculum design.</li> <li>- <b>Commitment</b> of the organization required for success in food conversion.</li> </ul>                                                                                                                                                                                                                                                                         |
|                                           | Denmark          | To map key curriculum components towards organic food conversion.                                                                                 | Public kitchen workers                                                       |                                                                                                                                                                                                                                                                                                                                                                                                                                                                                                                                                                                                                                                                                                                           |
|                                           | Research article |                                                                                                                                                   |                                                                              |                                                                                                                                                                                                                                                                                                                                                                                                                                                                                                                                                                                                                                                                                                                           |

|                                                         |                  |                                                                                                                                    |                           |                                                                                                                                                                                                                                                                                                                  |
|---------------------------------------------------------|------------------|------------------------------------------------------------------------------------------------------------------------------------|---------------------------|------------------------------------------------------------------------------------------------------------------------------------------------------------------------------------------------------------------------------------------------------------------------------------------------------------------|
| Sørensen NN,<br>Løje H, Tetens<br>I, <i>et al.</i> [63] | 2015             | To measure physical and<br>psychological well-being<br>among kitchen workers<br>involved in the Danish Organic<br>Action Plan 2020 | Danish public<br>kitchens | - <b>Gender</b> approach.                                                                                                                                                                                                                                                                                        |
|                                                         | Denmark          |                                                                                                                                    |                           | - <b>Training</b> as a key tool to increase commitment, improve beliefs,<br>attitudes and motivation among kitchen workers.                                                                                                                                                                                      |
|                                                         | Research article |                                                                                                                                    | Public Kitchen<br>workers | -Sense of ownership of the organic conversion process among kitchen<br>workers is key for success.<br>-No differences between baseline and follow-up on psychological well-<br>being.<br>-Only general body fatigue was highlighted.<br>-Positive impact on the job satisfaction, on joy and motivation to work. |

|                       |                  |                                                                                                                                                                                                                                                                                   |                                                            |                                                                                                                                                                                                                                                                                                                                                                                                                                                                                                                                                                                                                             |
|-----------------------|------------------|-----------------------------------------------------------------------------------------------------------------------------------------------------------------------------------------------------------------------------------------------------------------------------------|------------------------------------------------------------|-----------------------------------------------------------------------------------------------------------------------------------------------------------------------------------------------------------------------------------------------------------------------------------------------------------------------------------------------------------------------------------------------------------------------------------------------------------------------------------------------------------------------------------------------------------------------------------------------------------------------------|
| Bloomfield C.<br>[45] | 2015             | To understand how the<br>structures and processes of<br>governance on hospital food<br>provision enable and constrain<br>the ability of actors to frame<br>and put sustainability into<br>practice across the institutional<br>structures of the National<br>Health Service (NHS) | NHS hospital in<br>Wales                                   | - <b>Evaluation</b> of processes on Sustainable Procurement.                                                                                                                                                                                                                                                                                                                                                                                                                                                                                                                                                                |
|                       | UK               |                                                                                                                                                                                                                                                                                   |                                                            | - <b>Communication and relationship building.</b><br>- <b>Food service.</b> Assistance, impact on food waste.<br>Development of recipes and menus with seasonal and local<br>ingredients                                                                                                                                                                                                                                                                                                                                                                                                                                    |
|                       | Research article |                                                                                                                                                                                                                                                                                   | Those involved<br>in public<br>procurement or<br>provision | - <b>External leadership</b> to aid in the transition.<br>- <b>Food supply:</b> flexible approach to tender procedures and contract<br>innovation, relaxed food safety accreditation; nutritional standards as<br>qualitative elements to favour local-fresh produce; customer service<br>and setting a fixed price.<br>- <b>Investment:</b> offering infrastructure to SMEs to facilitate distribution.<br>- <b>Leadership:</b> a public procurement approach that encourages<br>leadership and learning through governance structures in<br>collaboration.<br>- <b>Governance:</b> vertical and horizontal collaboration. |

|                                             |                  |                                                                                                                                                                  |                                                                                    |                                                                                                                                                                                                                                                                                                                                                                                                                                                                                                                                                                                                                         |
|---------------------------------------------|------------------|------------------------------------------------------------------------------------------------------------------------------------------------------------------|------------------------------------------------------------------------------------|-------------------------------------------------------------------------------------------------------------------------------------------------------------------------------------------------------------------------------------------------------------------------------------------------------------------------------------------------------------------------------------------------------------------------------------------------------------------------------------------------------------------------------------------------------------------------------------------------------------------------|
| Cohen G. [46]                               | 2015             | To underline the lack of food care in the health system and raise the economic and social importance of a health system that takes care of food                  | Hospital cafeteria                                                                 | - <b>Holistic approach</b> : sustainable and healthy food as treatment and prevention.<br>- <b>Leadership</b> and <b>commitment</b> by managerial and medical staff and workers.<br>- <b>Sustainable food supply</b> : relocalization of food procurement impacts on community economy and health.<br>- <b>Training</b> .<br>- <b>Sustainable food service</b> . Also in retail and vending with sustainable food.<br>- <b>Peer-to-peer</b> and <b>communication</b> .<br>-Hospitals can <b>team-up with other</b> industries where food and health are inextricably linked to build a powerful sustainable food model. |
|                                             | USA              |                                                                                                                                                                  | Hospital food system management                                                    |                                                                                                                                                                                                                                                                                                                                                                                                                                                                                                                                                                                                                         |
|                                             | Opinion article  |                                                                                                                                                                  |                                                                                    |                                                                                                                                                                                                                                                                                                                                                                                                                                                                                                                                                                                                                         |
| Perline A., Heuscher A., <i>et al.</i> [47] | 2015             | To compare and contrast the perceptions and attitudes of food producers and distributors, as well as hospital staff involved in food procurement and management. | Hospital cafeterias                                                                | - <b>Gender</b> approach.<br>- <b>Communication</b> and <b>partnership</b> between producer and institution.<br>- <b>Long term commitment</b> in contracts, investments... (i.e. processing facilities)<br>- <b>Training</b> and networking for staff to increase commitment and enthusiasm<br>- <b>Food supply</b> : the demand should fit the capacity of local production and seasonality.<br><b>Leadership</b> necessary.                                                                                                                                                                                           |
|                                             | USA              |                                                                                                                                                                  | Hospital food procurement, management staff, local food producers and distributors |                                                                                                                                                                                                                                                                                                                                                                                                                                                                                                                                                                                                                         |
|                                             | Research article |                                                                                                                                                                  |                                                                                    |                                                                                                                                                                                                                                                                                                                                                                                                                                                                                                                                                                                                                         |
| Beer & Lemmer [62]                          | 2011             | To understand the nature of the food supply chain and the way that environmental “costs” are accumulated                                                         | Catering sector                                                                    | - <b>Holistic</b> approach to evaluate the impacts of the food system.<br>- <b>Evaluation</b> strategy for cost implications.<br>- <b>Investments</b> . Make Farm-to-Hospital Partnerships more productive (staff, infrastructure...).                                                                                                                                                                                                                                                                                                                                                                                  |
|                                             | UK               |                                                                                                                                                                  | Agents interested in food procurement                                              |                                                                                                                                                                                                                                                                                                                                                                                                                                                                                                                                                                                                                         |
|                                             | Research article |                                                                                                                                                                  |                                                                                    |                                                                                                                                                                                                                                                                                                                                                                                                                                                                                                                                                                                                                         |

|                                |                  |                                                                                                                                                                             |                                                   |                                                                                                                                                                                                                                                                                                                                                                                                                                                                                                                                                                                                                                                                                                                                                            |
|--------------------------------|------------------|-----------------------------------------------------------------------------------------------------------------------------------------------------------------------------|---------------------------------------------------|------------------------------------------------------------------------------------------------------------------------------------------------------------------------------------------------------------------------------------------------------------------------------------------------------------------------------------------------------------------------------------------------------------------------------------------------------------------------------------------------------------------------------------------------------------------------------------------------------------------------------------------------------------------------------------------------------------------------------------------------------------|
| Sonnino R. & McWilliam S. [23] | 2011             |                                                                                                                                                                             | Hospitals in Wales                                | <ul style="list-style-type: none"> <li>- <b>Holistic</b> approach to food waste.</li> <li>- <b>Governance:</b> integral approach with key actors for waste-sensitive public procurement strategies.</li> <li>- <b>Food service</b> (i.e. protected mealtimes, bulk <i>vs.</i> plated food, <i>etc.</i>) and <b>food quality</b> linked to waste.</li> <li>- <b>Evaluation:</b> food quality, food waste monitoring, economic impact...</li> <li>- <b>Communication</b> between patient and staff to define the reasons behind food wastage</li> <li>- <b>Training</b> gaps on food waste issues.</li> <li>- <b>Commitment</b> of staff and institutions to buying sustainably.</li> <li>- <b>Investments</b> in infrastructure, staff and time.</li> </ul> |
|                                | UK               | To contribute to the emerging sustainable food system debate through a focus on the links between hospital food waste, catering practices and public procurement strategies | Catering managers, dietetic assistants and nurses |                                                                                                                                                                                                                                                                                                                                                                                                                                                                                                                                                                                                                                                                                                                                                            |
|                                | Research article |                                                                                                                                                                             |                                                   |                                                                                                                                                                                                                                                                                                                                                                                                                                                                                                                                                                                                                                                                                                                                                            |

|                            |                  |                                                                                                                              |                                                                                      |                                                                                                                                                                                                                                                                                                                                                                                                                                                                                                                                                                                                                                                                                                               |
|----------------------------|------------------|------------------------------------------------------------------------------------------------------------------------------|--------------------------------------------------------------------------------------|---------------------------------------------------------------------------------------------------------------------------------------------------------------------------------------------------------------------------------------------------------------------------------------------------------------------------------------------------------------------------------------------------------------------------------------------------------------------------------------------------------------------------------------------------------------------------------------------------------------------------------------------------------------------------------------------------------------|
| Wilson ED & Garcia AC [48] | 2011             |                                                                                                                              | Hospitals                                                                            | <ul style="list-style-type: none"> <li>- <b>Gender</b> approach.</li> <li>- <b>Training</b> of staff from a holistic approach. Low scores in the beliefs, behaviours and attitudes on food category could be due to lack of knowledge. Need for education on environmental impacts of food choices.</li> <li>- <b>Marketing and awareness</b> campaigns to increase impact in belief in and behaviour towards sustainable diets.</li> <li>- <b>Leadership</b> to support environmentally friendly practices. Food experts as leaders of food strategy.</li> <li>- <b>Governance</b> with green focus decision-making.</li> <li>- <b>Investment.</b></li> <li>- <b>Evaluation</b> of the situation.</li> </ul> |
|                            | Canada           | To explore the beliefs, attitudes, and behaviours related to environmentally friendly practices in health care food services | Food service managers, clinical dietitians, food service technicians, senior leaders |                                                                                                                                                                                                                                                                                                                                                                                                                                                                                                                                                                                                                                                                                                               |
|                            | Research article |                                                                                                                              |                                                                                      |                                                                                                                                                                                                                                                                                                                                                                                                                                                                                                                                                                                                                                                                                                               |

|                                          |                 |                                                                                                                                                                           |                                                                                               |                                                                                                                                                                                                                                                                                                                                                                                                                                                                                                                                                                                                                                                                                                                                        |
|------------------------------------------|-----------------|---------------------------------------------------------------------------------------------------------------------------------------------------------------------------|-----------------------------------------------------------------------------------------------|----------------------------------------------------------------------------------------------------------------------------------------------------------------------------------------------------------------------------------------------------------------------------------------------------------------------------------------------------------------------------------------------------------------------------------------------------------------------------------------------------------------------------------------------------------------------------------------------------------------------------------------------------------------------------------------------------------------------------------------|
| DG Environment. European Commission [29] | 2016            | To help public authorities successfully plan and implement GPP, under the 2014 Procurement Directives                                                                     | Public institutions                                                                           | <ul style="list-style-type: none"><li>- <b>Process approach</b> with clear targets and time frames.</li><li>- <b>Governance:</b> multidisciplinary team to design, plan and develop a food procurement process from a green perspective (i.e. MEAT, minimum percentage of organic...). Contract requirements and awarding criteria have to be verifiable.</li><li>- <b>Training</b> at various levels: strategy development, tendering application.</li><li>- <b>Peer-to-peer</b> network to pass on the knowledge.</li><li>- <b>Managerial Leadership and support.</b> High-level support is an important factor for the success of GPP.</li><li>- <b>Evaluation</b> and monitoring system.</li></ul>                                 |
|                                          | Belgium         |                                                                                                                                                                           | Public authorities, corporate purchasers, suppliers and service providers – particularly SMEs |                                                                                                                                                                                                                                                                                                                                                                                                                                                                                                                                                                                                                                                                                                                                        |
|                                          | Policy handbook |                                                                                                                                                                           |                                                                                               |                                                                                                                                                                                                                                                                                                                                                                                                                                                                                                                                                                                                                                                                                                                                        |
| Hajnalka P., et al. [51]                 | 2018            | To provide support to stakeholders in the design and implementation of public food procurement initiatives that aim to facilitate food purchases from smallholder farmers | Global public institutions                                                                    | <ul style="list-style-type: none"><li>- <b>Food supply:</b> scale up of smallholder farmers into PFP procedures (to be competitive against large food traders). Planning and preparing of procurement requirements bearing in mind the local capacity and characteristics.</li><li>- <b>Advantages for smallholders:</b> preferential treatment, on-time payments, access to tender information.</li><li>- <b>Training</b> smallholder farmers to tender.</li><li>- <b>Investment</b> in business capacity for smallholder farmer.</li><li>- <b>Holistic approach:</b> avoid silo mentality in the workplace</li><li>- <b>Governance:</b> Multi-sector, multi-level structures with an integral approach to the food system.</li></ul> |
|                                          | EU              |                                                                                                                                                                           | Policymakers                                                                                  |                                                                                                                                                                                                                                                                                                                                                                                                                                                                                                                                                                                                                                                                                                                                        |
|                                          | Policy guidance |                                                                                                                                                                           |                                                                                               |                                                                                                                                                                                                                                                                                                                                                                                                                                                                                                                                                                                                                                                                                                                                        |
| Hernández-Olivan, P [59]                 | 2019            | To provide guidelines for healthcare organisations to procure healthier and sustainable vending services                                                                  | Health care services                                                                          | <ul style="list-style-type: none"><li>- <b>Lead by example</b> in vending machines.</li><li>- <b>Communication/awareness:</b> healthy options, recycling, sustainability culture in vending.</li><li>- <b>Trustful relationship:</b> engage with suppliers.</li><li>- <b>Investment:</b> energy efficient equipment.</li><li>- <b>Food service:</b> with waste strategy.</li><li>- <b>Food supply:</b> organic and fair trade products. Drinking water freely available</li><li>- <b>Peer-to-peer:</b> share knowledge.</li></ul>                                                                                                                                                                                                      |
|                                          | Belgium         |                                                                                                                                                                           | Vending food procurement authority                                                            |                                                                                                                                                                                                                                                                                                                                                                                                                                                                                                                                                                                                                                                                                                                                        |
|                                          | Factsheet       |                                                                                                                                                                           |                                                                                               |                                                                                                                                                                                                                                                                                                                                                                                                                                                                                                                                                                                                                                                                                                                                        |

|                          |                |                                                                                                                                                        |                                                                   |                                                                                                                                                                                                                                                                                                                                                                                                                                                                                                                                                                                                                                                                                                                                                                                                                                                                                                                                                                                                       |
|--------------------------|----------------|--------------------------------------------------------------------------------------------------------------------------------------------------------|-------------------------------------------------------------------|-------------------------------------------------------------------------------------------------------------------------------------------------------------------------------------------------------------------------------------------------------------------------------------------------------------------------------------------------------------------------------------------------------------------------------------------------------------------------------------------------------------------------------------------------------------------------------------------------------------------------------------------------------------------------------------------------------------------------------------------------------------------------------------------------------------------------------------------------------------------------------------------------------------------------------------------------------------------------------------------------------|
| Hernández-Olivan, P [50] | 2018           |                                                                                                                                                        | Health care services                                              | <ul style="list-style-type: none"> <li>-<b>Governance:</b> multidisciplinary, multilevel group to develop and evaluate the SFP and food waste strategy.</li> <li>-<b>Food supply:</b> local, fresh, organic, seasonal.</li> <li>-<b>Food service:</b> as an educative tool.</li> </ul>                                                                                                                                                                                                                                                                                                                                                                                                                                                                                                                                                                                                                                                                                                                |
|                          | Belgium        | Facilitate recommendations for Sustainable Food Procurement (SFP) strategy                                                                             | Policy makers, Hospitals' Sustainable procurement management team | <ul style="list-style-type: none"> <li>-<b>Food service</b> that avoids food waste: ordering, portion size, assistance to eat, creative menu, flexible food ordering system, creative use of leftovers...</li> <li>-<b>Training</b> and <b>awareness</b> for health professionals on healthy, sustainable food and food waste.</li> <li>-<b>Peer-to-peer</b> learning and networks to leverage the purchasing power.</li> <li>-<b>Communication</b> for networking (between local producers, staff...).</li> <li>-<b>Marketing</b>, celebrate successes.</li> <li>-<b>Evaluation</b> of SFP strategy: surveys, food waste control...</li> </ul>                                                                                                                                                                                                                                                                                                                                                       |
|                          | Factsheet      |                                                                                                                                                        |                                                                   |                                                                                                                                                                                                                                                                                                                                                                                                                                                                                                                                                                                                                                                                                                                                                                                                                                                                                                                                                                                                       |
| HCWH Europe [49]         | 2008           |                                                                                                                                                        | Health care services.                                             | <ul style="list-style-type: none"> <li>-<b>Evaluation:</b> research and planning.</li> <li>-<b>Communication</b> and <b>marketing</b> of activities. Publicity to attract suppliers.</li> <li>-Managerial <b>leadership</b>.</li> <li>-<b>Process approach</b>, with a range of stakeholders in the planning.</li> <li>-<b>Governance:</b> multi-disciplinary. Use tenders/contracts to define the sustainability criteria. Split contracts into lots.</li> <li>-<b>Food service:</b> short supply chains improve quality of menus.</li> <li>-<b>Food supply:</b> make a strong network of local and organic suppliers and cooperatives.</li> <li>-<b>Training</b> small producers on public-sector procurement.</li> <li>-<b>Trustful relationship</b> with suppliers.</li> <li>-<b>Investments:</b> training and infrastructure.</li> <li>-<b>External third party</b> partner to help in process development and evaluation. Partnerships to create economies of scale and avoid waste.</li> </ul> |
|                          | Czech Republic | To explain how hospitals have succeeded in providing patients with more appetising and nutritious meals, made with more local and organic ingredients. | Policymakers, Hospitals' Sustainable procurement management team. |                                                                                                                                                                                                                                                                                                                                                                                                                                                                                                                                                                                                                                                                                                                                                                                                                                                                                                                                                                                                       |
|                          | Factsheet      |                                                                                                                                                        |                                                                   |                                                                                                                                                                                                                                                                                                                                                                                                                                                                                                                                                                                                                                                                                                                                                                                                                                                                                                                                                                                                       |

|                               |                |                                                                                                                                                           |                                                                 |                                                                                                                                                                                                                                                                                                                                                                                                                                                                                                                                                                                                                                                                                                                                                                                                                                                                                                                                                                                   |
|-------------------------------|----------------|-----------------------------------------------------------------------------------------------------------------------------------------------------------|-----------------------------------------------------------------|-----------------------------------------------------------------------------------------------------------------------------------------------------------------------------------------------------------------------------------------------------------------------------------------------------------------------------------------------------------------------------------------------------------------------------------------------------------------------------------------------------------------------------------------------------------------------------------------------------------------------------------------------------------------------------------------------------------------------------------------------------------------------------------------------------------------------------------------------------------------------------------------------------------------------------------------------------------------------------------|
| Barling D. <i>et al.</i> [52] | 2013           | To explore the changes happening in public food procurement through inspiring cases of various European cities (Malmö, East Earshyre, Copenhagen, Vienna) | Hospitals and schools                                           | <ul style="list-style-type: none"><li>-Managerial <b>leadership</b></li><li>- <b>Commitment</b> of key actors. Political will to change.</li><li>-<b>Process approach.</b> Setting clear goals and dates. Adopting an incremental approach.</li><li>-<b>Governance:</b> inclusive, open to discussion. Engage civil society.</li><li>- Contracts with Life-Cycle evaluation approach.</li><li>-<b>Evaluation</b> (monitor targets). Food waste. Economic control.</li><li>-<b>External certification.</b></li><li>-<b>Training</b> to commit to change towards SFP. Inspire commitment and ensure skills</li><li>- <b>Investment.</b> SME infrastructure for competitiveness (support ability for distribution and tendering).</li><li>-<b>Food supply:</b> local capacity to match demand.</li><li>-<b>Food service:</b> on site facilities. New menus.</li><li>-<b>Awareness:</b> Community engagement.</li></ul>                                                               |
|                               | UK             |                                                                                                                                                           | Procurement decision-makers, health professionals, policymakers |                                                                                                                                                                                                                                                                                                                                                                                                                                                                                                                                                                                                                                                                                                                                                                                                                                                                                                                                                                                   |
|                               | Project report |                                                                                                                                                           |                                                                 |                                                                                                                                                                                                                                                                                                                                                                                                                                                                                                                                                                                                                                                                                                                                                                                                                                                                                                                                                                                   |
|                               |                |                                                                                                                                                           |                                                                 |                                                                                                                                                                                                                                                                                                                                                                                                                                                                                                                                                                                                                                                                                                                                                                                                                                                                                                                                                                                   |
| Michaels, S. [57]             | 2006           | To summarise the key factors in sustainable procurement practice.                                                                                         | Public Food procurement sector                                  | <ul style="list-style-type: none"><li>-<b>Investment:</b> kitchen, Cooperative ventures.</li><li>-<b>Holistic approach:</b> SFP strategy multiplier effect.</li><li>- <b>Trustful relations</b> through proactivity. Fair treatment of suppliers, mainly in payment terms. Grow confidence.</li><li>- <b>Food supply:</b> match the needs to local capacity. Local suppliers more responsive. Proactive buying organisations to seek out local producers.</li><li>- <b>Governance:</b> facilitate small producers’ information and access to tender (i.e. split contracts into lots, match supply needs to local capacity, contract based on MEAT).</li><li>-<b>Food service:</b> local, seasonal, nutritious menus.</li><li>-<b>Awareness:</b> on sustainable food and healthy eating.</li><li>-<b>Training:</b> motivation and skilling up staff, producers.</li><li>- <b>Evaluation</b> and monitoring by a third party.</li><li>- <b>External leadership:</b> NGOs.</li></ul> |
|                               | UK             |                                                                                                                                                           | Purchasing decision-makers                                      |                                                                                                                                                                                                                                                                                                                                                                                                                                                                                                                                                                                                                                                                                                                                                                                                                                                                                                                                                                                   |
|                               | Project report |                                                                                                                                                           |                                                                 |                                                                                                                                                                                                                                                                                                                                                                                                                                                                                                                                                                                                                                                                                                                                                                                                                                                                                                                                                                                   |
|                               |                |                                                                                                                                                           |                                                                 |                                                                                                                                                                                                                                                                                                                                                                                                                                                                                                                                                                                                                                                                                                                                                                                                                                                                                                                                                                                   |

|                               |                  |                                                                                                                              |                                                                  |                                                                                                                                                                                                                                                                                                                                                                                                                                                                                                                                                                                                                                                                                                                                                                                                                                                                                                                      |
|-------------------------------|------------------|------------------------------------------------------------------------------------------------------------------------------|------------------------------------------------------------------|----------------------------------------------------------------------------------------------------------------------------------------------------------------------------------------------------------------------------------------------------------------------------------------------------------------------------------------------------------------------------------------------------------------------------------------------------------------------------------------------------------------------------------------------------------------------------------------------------------------------------------------------------------------------------------------------------------------------------------------------------------------------------------------------------------------------------------------------------------------------------------------------------------------------|
| Boyano, A., et al. [61]       | 2019             |                                                                                                                              | Health care services.                                            | <ul style="list-style-type: none"> <li>- <b>Governance:</b> in EU GPP is a voluntary instrument.</li> <li>- <b>Food supply:</b> contract specifications to seek a SFPS.</li> <li>- <b>Food service:</b> food, catering, vending machines.</li> <li>- <b>Training</b> on GPP procedures for suppliers and staff.</li> <li>- <b>Support</b> small suppliers to fulfil the criteria and verifications for the GPP procedure to be successful.</li> </ul>                                                                                                                                                                                                                                                                                                                                                                                                                                                                |
|                               | Luxembourg       | To summarize the revision process of the Green Public Procurement (GPP) criteria for Food procurement and catering services. | Procurement decision-makers, health professionals, policy makers | <ul style="list-style-type: none"> <li>- <b>GPP criteria for food:</b> organic products labelling; Marine Conservation Society (MCS) red list; seasonal products labelling; fair and ethical trade products in accordance with the ILO; environmentally responsible vegetable fats; geographical indications.</li> <li>- <b>GPP criteria for catering services:</b> verify competences and experience of the company; EU GPP criteria for food; plant-based menus; food and general waste strategy; chemical products with EU Ecolabel; SOP for kitchen equipment; staff training.</li> <li>- <b>GPP criteria for vending machines:</b> organic food and Fair Trade products; environmentally responsible vegetable fats; smart controls; annual energy consumption; GWP of refrigerants; reusable cups; contract performance (acquire new vending machines).</li> <li>- <b>Evaluation</b> of procedures.</li> </ul> |
| Health Care Without Harm [26] | 2016             |                                                                                                                              | Healthcare institutions                                          | <ul style="list-style-type: none"> <li>- <b>Food supply:</b> invest time and resources to identify suppliers.</li> <li>- <b>Investment:</b> equipment, personnel and products.</li> <li>- <b>Evaluation:</b> monitoring and satisfaction surveys. Economic control to adjust budget.</li> </ul>                                                                                                                                                                                                                                                                                                                                                                                                                                                                                                                                                                                                                      |
|                               | Italy            | To offer evidence-based proposals for good practice on how to deliver sustainable and healthy food in hospitals.             | Responsible roles for sustainable and healthy practice.          | <ul style="list-style-type: none"> <li>- <b>Food service:</b> local, seasonal and organic. Healthy vending. Less meat. Food waste plan.</li> <li>- <b>Awareness:</b> educative role in many aspects.</li> <li>- <b>Training</b></li> </ul>                                                                                                                                                                                                                                                                                                                                                                                                                                                                                                                                                                                                                                                                           |
|                               | Technical report |                                                                                                                              |                                                                  |                                                                                                                                                                                                                                                                                                                                                                                                                                                                                                                                                                                                                                                                                                                                                                                                                                                                                                                      |
|                               | Project report   |                                                                                                                              |                                                                  |                                                                                                                                                                                                                                                                                                                                                                                                                                                                                                                                                                                                                                                                                                                                                                                                                                                                                                                      |

|                                     |                  |                                                                                                                                           |                                                                  |                                                                                                                                                                                                                                                                                                                                                                                                                                                                                                                                                                                                                                                                                                                                                                                                                                                                                                                                                                                                                                                                                                                                                                                                                                                             |
|-------------------------------------|------------------|-------------------------------------------------------------------------------------------------------------------------------------------|------------------------------------------------------------------|-------------------------------------------------------------------------------------------------------------------------------------------------------------------------------------------------------------------------------------------------------------------------------------------------------------------------------------------------------------------------------------------------------------------------------------------------------------------------------------------------------------------------------------------------------------------------------------------------------------------------------------------------------------------------------------------------------------------------------------------------------------------------------------------------------------------------------------------------------------------------------------------------------------------------------------------------------------------------------------------------------------------------------------------------------------------------------------------------------------------------------------------------------------------------------------------------------------------------------------------------------------|
| Jochelson K.,<br><i>et al.</i> [58] | 2005             |                                                                                                                                           | Hospitals                                                        | <ul style="list-style-type: none"> <li>- <b>Food supply:</b> policies based on sustainability.</li> <li>- <b>Holistic</b> approach to food policy.</li> <li>- <b>Training</b> suppliers and staff.</li> <li>- <b>“Health for profit”</b> vs. “leading by example”.</li> <li>- <b>Leadership</b> and <b>commitment</b>.</li> <li>- <b>Trustful relations</b> between institution and suppliers. Advice on tendering process. Relax the tendering process for smallholder producers. A fairer process.</li> <li>- <b>Communication</b> on SFP strategy to all users. Advertise upcoming contracts.</li> <li>- <b>Food service:</b> develop patient menus using local and seasonal ingredients, buy organic beef. Develop healthier vending machines. Food ordering system to avoid food waste.</li> <li>- <b>Evaluation</b> of economic costs.</li> <li>- <b>External party</b> input in food strategy development, with expertise in local food chains and public procurement.</li> <li>- <b>Peer-to-peer</b> training. Exploit and develop the expertise of regional procurement groups.</li> <li>- <b>Certifications</b> and assurance schemes. Enable the inclusion of food products with assurance schemes promoting sustainable agriculture.</li> </ul> |
|                                     | UK               | To identify opportunities for managing food procurement sustainably and promoting healthy eating in acute hospitals.                      | Procurement management, hospital staff, as well as policy makers |                                                                                                                                                                                                                                                                                                                                                                                                                                                                                                                                                                                                                                                                                                                                                                                                                                                                                                                                                                                                                                                                                                                                                                                                                                                             |
|                                     | Project report   |                                                                                                                                           |                                                                  |                                                                                                                                                                                                                                                                                                                                                                                                                                                                                                                                                                                                                                                                                                                                                                                                                                                                                                                                                                                                                                                                                                                                                                                                                                                             |
| Rimington M. & Carlton Smith J [60] | 2005             |                                                                                                                                           | Public institutions                                              | <ul style="list-style-type: none"> <li>- <b>Evaluation:</b> monitor progress, cost analysis and budget strategy.</li> <li>- <b>Long term commitment</b></li> <li>- <b>Awareness</b> of the rise of SFP demand and culture.</li> <li>- <b>Investment</b> in training and in equipment.</li> <li>- <b>Trustful relation:</b> map local producers.</li> <li>- <b>Training:</b> skill up of SFP</li> <li>- <b>Food supply:</b> policy for SFP that relaxes procedures for SME and food producers (i.e. Tendering, contracts, food safety certifications).</li> <li>- <b>Holistic approach</b> on policies, action plans and targets.</li> </ul>                                                                                                                                                                                                                                                                                                                                                                                                                                                                                                                                                                                                                 |
|                                     | UK               | To evaluate obstacles and to identify opportunities for a sustainable approach in public sector’s food procurement and catering services. | Food procurement managers and policymakers                       |                                                                                                                                                                                                                                                                                                                                                                                                                                                                                                                                                                                                                                                                                                                                                                                                                                                                                                                                                                                                                                                                                                                                                                                                                                                             |
|                                     | Technical report |                                                                                                                                           |                                                                  |                                                                                                                                                                                                                                                                                                                                                                                                                                                                                                                                                                                                                                                                                                                                                                                                                                                                                                                                                                                                                                                                                                                                                                                                                                                             |

|                              |                                      |                                                                                                                                                                   |                                                                       |                                                                                                                                                                                                                                                                                                                                                                                                                                                                                                                                                                                                                                                                                                                                                                                                                                                                                                                                                                                                                                                                                                                                                                                                                                                                                                                              |
|------------------------------|--------------------------------------|-------------------------------------------------------------------------------------------------------------------------------------------------------------------|-----------------------------------------------------------------------|------------------------------------------------------------------------------------------------------------------------------------------------------------------------------------------------------------------------------------------------------------------------------------------------------------------------------------------------------------------------------------------------------------------------------------------------------------------------------------------------------------------------------------------------------------------------------------------------------------------------------------------------------------------------------------------------------------------------------------------------------------------------------------------------------------------------------------------------------------------------------------------------------------------------------------------------------------------------------------------------------------------------------------------------------------------------------------------------------------------------------------------------------------------------------------------------------------------------------------------------------------------------------------------------------------------------------|
| Cioci G., <i>et al.</i> [28] | 2016                                 |                                                                                                                                                                   | Healthcare institutions                                               | <ul style="list-style-type: none"> <li>- <b>Awareness:</b> hospital food as an educative tool.</li> <li>- <b>Holistic approach:</b> key for SFP success.</li> <li>- <b>Governance:</b> clear objectives and targets. Develop a food waste strategy. Working group establishment.</li> <li>- <b>Food service:</b> menu variations. SFP stimulates appetite and recovery. Tap water is encouraged.</li> <li>- <b>Training</b> on food waste and food safety (traceability). Geographical Indicator labelling useful for traceability and quality of products.</li> <li>- <b>Food supply:</b> on-site kitchens guarantee control over menu and food quality. Continuous provision is difficult for small producers.</li> <li>- <b>Evaluation:</b> budget control.</li> <li>- <b>Trustful relation:</b> close partnership between supplier and hospital for best ingredients.</li> </ul>                                                                                                                                                                                                                                                                                                                                                                                                                                         |
|                              | Belgium                              | To highlight the common challenges in implementing healthy and sustainable food policies in European hospitals, and to provide good examples to encourage others. | Procurement management staff, healthcare professionals, policymakers. |                                                                                                                                                                                                                                                                                                                                                                                                                                                                                                                                                                                                                                                                                                                                                                                                                                                                                                                                                                                                                                                                                                                                                                                                                                                                                                                              |
|                              | Technical report                     |                                                                                                                                                                   |                                                                       |                                                                                                                                                                                                                                                                                                                                                                                                                                                                                                                                                                                                                                                                                                                                                                                                                                                                                                                                                                                                                                                                                                                                                                                                                                                                                                                              |
| European Union [32]          | 2014                                 |                                                                                                                                                                   | Public Institution                                                    | <ul style="list-style-type: none"> <li>- <b>Food Supply Governance:</b> adapt EU policy to introduce SMEs.</li> <li>- <b>Holistic approach:</b> contract performance with various dimensions.</li> <li>- <b>Trustful relation and training:</b> assure that SMEs know requirements (i.e. certifications) and bureaucratic steps.</li> <li>- Must comply with the <i>Treaty on the Functioning of the EU</i>.</li> <li>- <b>Art. 5:</b> Lot values of less than €80 000 are not subject to the provisions of the Directive. The sum value of lots shall not exceed 20% of the total.</li> <li>- <b>Art. 18:</b> equal treatment.</li> <li>- <b>Art. 46:</b> contracting authorities encouraged to break contracts into lots.</li> <li>- <b>Art. 57 to 64 criteria for qualitative selection.</b> Quality assurance and environmental management standards certified by accredited bodies.</li> <li>- <b>Art. 67:</b> contract award → MEAT (not compulsory) or price/cost only.</li> <li>- <b>Art. 68:</b> life-cycle costing (<i>indicate method used</i>) covers: (a) costs, borne by the contracting authority; (b) costs of environmental externalities.</li> <li>- <b>Art. 70:</b> contract performance may include economic, innovation-related, environmental, social or employment-related considerations.</li> </ul> |
|                              | European Union                       | To set out the criteria for Public Procurement to be followed by all the member states                                                                            | Policy makers and National Governments                                |                                                                                                                                                                                                                                                                                                                                                                                                                                                                                                                                                                                                                                                                                                                                                                                                                                                                                                                                                                                                                                                                                                                                                                                                                                                                                                                              |
|                              | Directive Legislative act 2014/24/EU |                                                                                                                                                                   |                                                                       |                                                                                                                                                                                                                                                                                                                                                                                                                                                                                                                                                                                                                                                                                                                                                                                                                                                                                                                                                                                                                                                                                                                                                                                                                                                                                                                              |
